# Supplementary material
Source: Springer Nature journal article supplement (https://www.springermedizin.de/resource/supplementary/12936_2014_3326_MOESM9_ESM.pdf/9545666)
Supplement: MOESM9 [file 9545666]

|     |     |     |      |      |      |     |     |     |
|-----|-----|-----|------|------|------|-----|-----|-----|
| 3.7 | 1.2 | 3.3 | 18.4 | 73.7 | 12.9 | 3.2 | 2.6 | 1.8 |
|-----|-----|-----|------|------|------|-----|-----|-----|

145.7

|     |     |     |
|-----|-----|-----|
| 4.1 | 2.6 | 3.8 |
| 1.5 | 2.3 | 2.2 |
| 2.4 | 2.2 | 3.9 |
